# Supplementary material
Source: PubMed Central journal article supplement (PMC7266526)
Supplement: NIHMS1593280-supplement-1.pdf [file NIHMS1593280-supplement-1.pdf]

## Supporting Information

# **An improved strategy for fluorescent tagging of membrane proteins for overexpression and purification in mammalian cells**

*Mitra S. Rana, Xiyu Wang, Anirban Banerjee*

Cell Biology and Neurobiology Branch, National Institute for Child Health and Development,  
National Institutes of Health, Bethesda, MD-20892.

Anirban Banerjee, [anirban.banerjee@nih.gov](mailto:anirban.banerjee@nih.gov); Mitra S. Rana, [mitra.rana@nih.gov](mailto:mitra.rana@nih.gov)

Table S1

| Protein   | Coding Sequence                                                                                                                                                                                                                                                                                                                                                                                                                                                                                                                                                                                                                                                                                                                                                                                                             |
|-----------|-----------------------------------------------------------------------------------------------------------------------------------------------------------------------------------------------------------------------------------------------------------------------------------------------------------------------------------------------------------------------------------------------------------------------------------------------------------------------------------------------------------------------------------------------------------------------------------------------------------------------------------------------------------------------------------------------------------------------------------------------------------------------------------------------------------------------------|
| mVenus    | <p>ATGGTGAGCAAGGGCGAGGAGCTGTTACCGGGGTGGTGCCCATCCTGGTCGAGCTG<br/> GACGGCGACGTAAACGGCCACAAGTTCAGCGTGTCCGGCGAGGGCGAGGGCGATGC<br/> CACCTaCGGCAAGCTGACCCTGAAGCTGATCTGCACCACCGGCAAGCTGCCCGTGCC<br/> CTGGCCCCACCCTCGTGACCACCCTGGGCTACGGCCTGCAGTGCTTCGCCCCGCTACCCC<br/> GACCACATGAAGCAGCAGACTTCTTCAAGTCCGCCATGCCCGAAGGCTACGTCCAG<br/> GAGCGCACCATCTTCTTCAAGGACGACGGCAACTACAAGACCCGCGCCGAGGTGAA<br/> GTTCGAGGGCGACACCCTGGTGAACCGCATCGAGCTGAAGGGCATCGACTTCAAGG<br/> AGGACGGCAACATCCTGGGGCACAAGCTGGAGTACAACGCCATCAGCGACAACGTC<br/> TATATCACCGCCGACAAGCAGAAGAACGGCATCAAGGCCAATTCAAGATCCGCCA<br/> CAACATCGAGGACGGCGGCGTGCAGCTCGCCGACCACTACCAGCAGAACACCCCCA<br/> TCGGCGACGGCCCCGTGCTGCTGCCCGACAaCCACTACCTGAGCTACCAGTCCAAGCT<br/> GAGCAAAGAaCCCAACGAGAAGCGCGATCACATGGTCCTGCTGGAGTTCGTGACCGC<br/> CGCCGGGATCACTCTCGGCATGGACGAGCTGTACAAG</p> |
| mCerulean | <p>ATGGTGAGCAAGGGCGAGGAGCTGTTACCGGGGTGGTGCCCATCCTGGTCGAGCTG<br/> GACGGCGACGTAAACGGCCACAAGTTCAGCGTGTCCGGCGAGGGCGAGGGCGATGC<br/> CACCTACGGCAAGCTGACCCTGAAGTTCATCTGCACCACCGGCAAGCTGCCCGTGCC<br/> CTGGCCCCACCCTCGTGACCACCCTGACCTAGGCGCTGCAGTGCTTCGCCCCGCTACCCC<br/> GACCACATGAAGCAGCAGACTTCTTCAAGTCCGCCATGCCCGAAGGCTACGTCCAG<br/> GAGCGCACCATCTTCTTCAAGGACGACGGCAACTACAAGACCCGCGCCGAGGTGAA<br/> GTTCGAGGGCGACACCCTGGTGAACCGCATCGAGCTGAAGGGCATCGACTTCAAGG<br/> AGGACGGCAACATCCTGGGGCACAAGCTGGAGTACAACGCCATCAGCGACAACGTC<br/> TATATCACCGCCGACAAGCAGAAGAACGGCATCAAGGCCAATTCAAGATCCGCCA<br/> CAACATCGAGGACGGCAGCGTGCAGCTCGCCGACCACTACCAGCAGAACACCCCCA<br/> TCGGCGACGGCCCCGTGCTGCTGCCCGACAACCACTACCTGAGCACCCAGTCCAAGC<br/> TGAGCAAAGACCCCAACGAGAAGCGCGATCACATGGTCCTGCTGGAGTTCGTGACCG<br/> CCGCCGGGATCACTCTCGGCATGGACGAGCTGTACAAG</p> |
| mEGFP     | <p>ATGGTGAGCAAGGGCGAGGAGCTGTTACCGGGGTGGTGCCCATCCTGGTCGAGCTG<br/> GACGGCGACGTAAACGGCCACAAGTTCAGCGTGTCCGGCGAGGGCGAGGGCGATGC<br/> CACCTACGGCAAGCTGACCCTGAAGTTCATCTGCACCACCGGCAAGCTGCCCGTGCC<br/> CTGGCCCCACCCTCGTGACCACCCTGACCTACGGCCTGCAGTGCTTCAGCCGCTACCCC<br/> GACCACATGAAGCAGCAGACTTCTTCAAGTCCGCCATGCCCGAAGGCTACGTCCAG<br/> GAGCGCACCATCTTCTTCAAGGACGACGGCAACTACAAGACCCGCGCCGAGGTGAA<br/> GTTCGAGGGCGACACCCTGGTGAACCGCATCGAGCTGAAGGGCATCGACTTCAAGG<br/> AGGACGGCAACATCCTGGGGCACAAGCTGGAGTACAACGCCATCAGCGACAACGTC<br/> TATATCATGGCCGACAAGCAGAAGAACGGCATCAAGGTGAATTCAAGATCCGCCA<br/> CAACATCGAGGACGGCAGCGTGCAGCTCGCCGACCACTACCAGCAGAACACCCCCA<br/> TCGGCGACGGCCCCGTGCTGCTGCCCGACAACCACTACCTGAGCACCCAGTCCAAGC<br/> TGAGCAAAGACCCCAACGAGAAGCGCGATCACATGGTCCTGCTGGAGTTCGTGACCG<br/> CCGCCGGGATCACTCTCGGCATGGACGAGCTGTACAAG</p>  |
| mCherry   | <p>ATGGTGAGCAAGGGCGAGGAGGATAACATGGCCATCATCAAGGAGTTCATGCGCTT<br/> CAAGGTGCACATGGAGGGCTCCGTGAACGGCCACGAGTTCGAGATCGAGGGCGAGG<br/> GCGAGGGCCGCCCTACGAGGGCACCCAGACCGCAAGCTGAAGGTGACCAAGGGT<br/> GGCCCCCTGCCCTTCGCTGGGACATCCTGTCCCCTCAGTTCATGTACGGCTCCAAGG<br/> CCTACGTGAAGCACCCCGCGACATCCCCGACTACTTGAAGCTGTCCTTCCCCGAGG<br/> GCTTCAAGTGGGAGCGCGTGATGAACTTCGAGGACGGCGGCGTGGTGACCGTGACCC<br/> AGGACTCCTCCCTGCAGGACGGCGAGTTCATCTACAAGGTGAAGCTGCGCGGACCA<br/> ACTTCCCCTCCGACGGCCCCGTAATGCAGAAGAAGACCATGGGCTGGGAGGCCTCCT<br/> CCGAGCGGATGTACCCCGAGGACGGCGCCCTGAAGGGCGAGATCAAGCAGAGGCTG<br/> AAGCTGAAGGACGGCGGCCACTACGACGCTGAGGTCAAGACCACCTACAAGGCCAA<br/> GAAGCCCGTGCAGCTGCCCGGCGCCTACAACGTCAACATCAAGTTGGACATCACCTC<br/> CCACAACGAGGACTACACCATCGTGGAACAGTACGAACGCGCCGAGGGCCGCGCACT<br/> CCACCGGCGGCATGGACGAGCTGTACAAG</p>             |



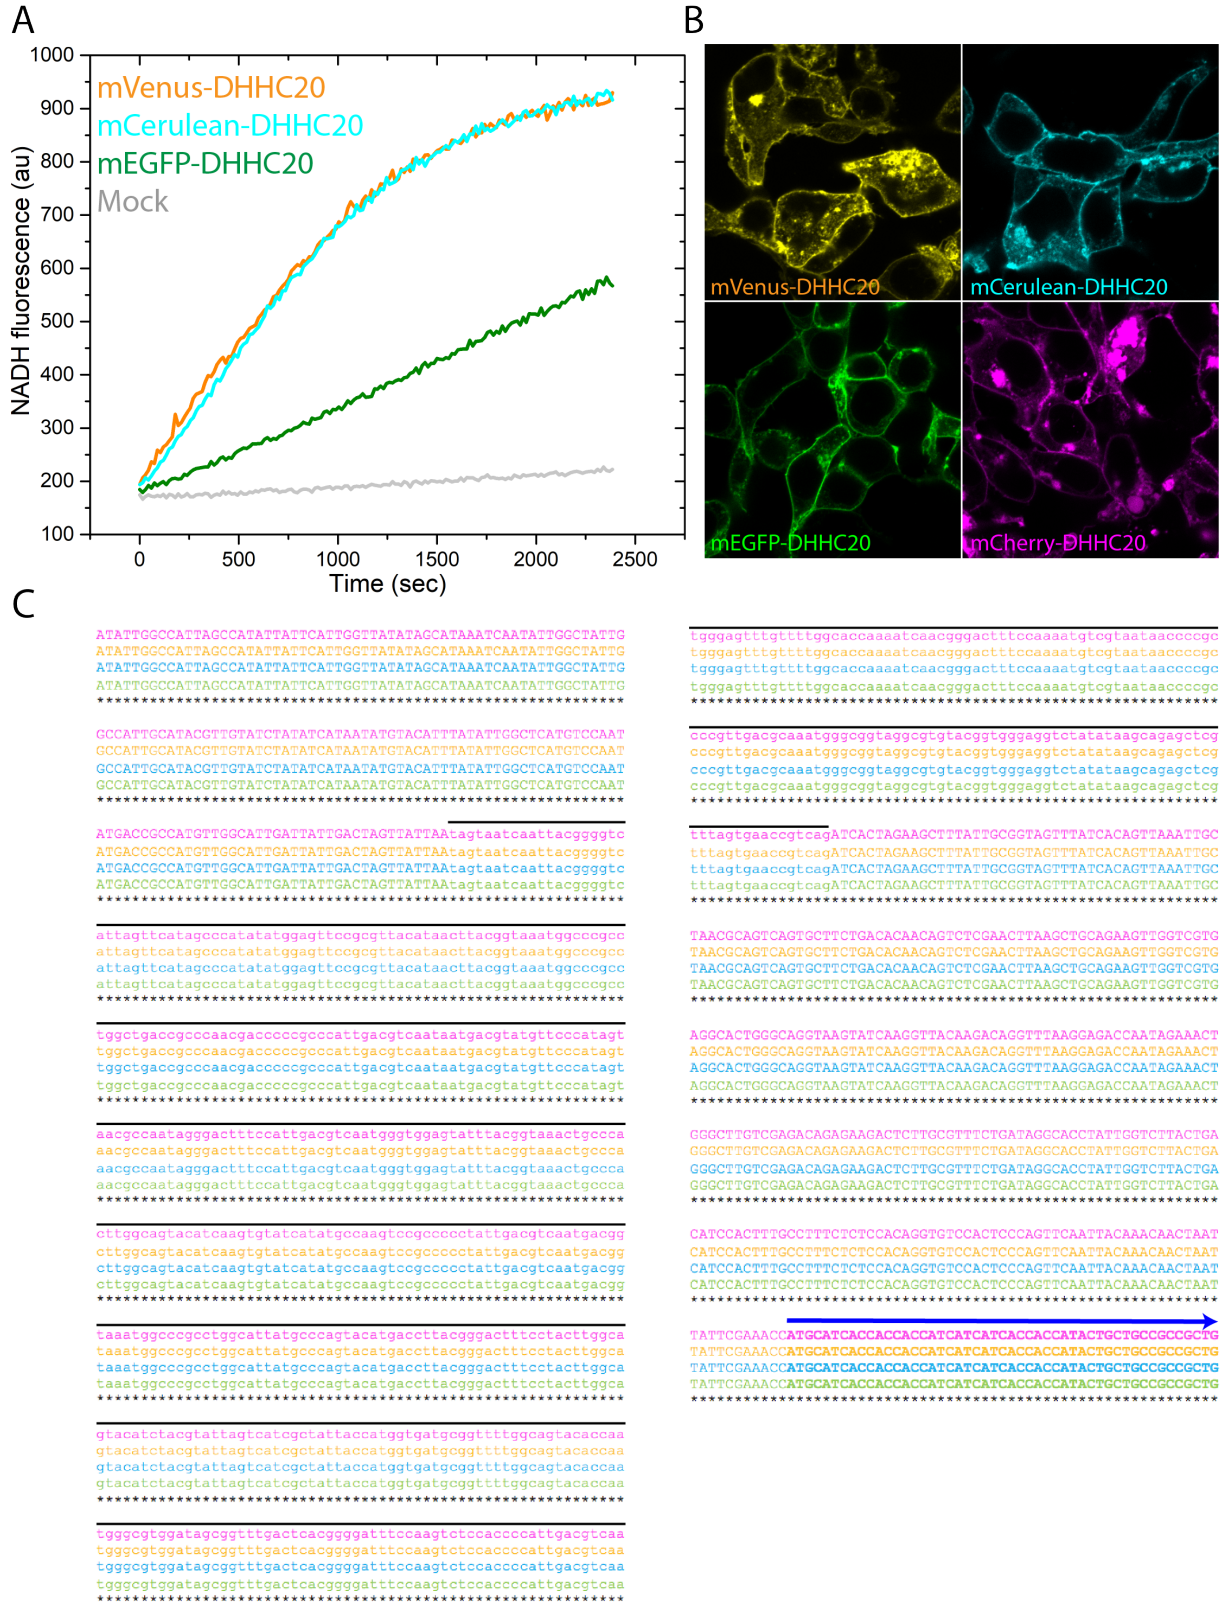

**Figure S1.** Activity and expression of human DHHC20 protein tagged with fluorescent proteins. (A) Auto-palmitoylation activity of cell lysates from HEK293T cells transiently expressing

DHHC20 palmitoyltransferase enzyme tagged with the different fluorescent proteins. **(B)** Confocal microscopy of HEK293T cells over-expressing DHHC20 tagged with the different fluorescent proteins showing that they localize similarly. **(C)** Sequence of the DNA region upstream of the start codon (blue arrow). The CMV promoter (black line) is intact for all the constructs. Orange, mVenus-DHHC20; Cyan, mCerulean-DHHC20; Green, mEGFP-DHHC20; Magenta, mCherry-DHHC20.

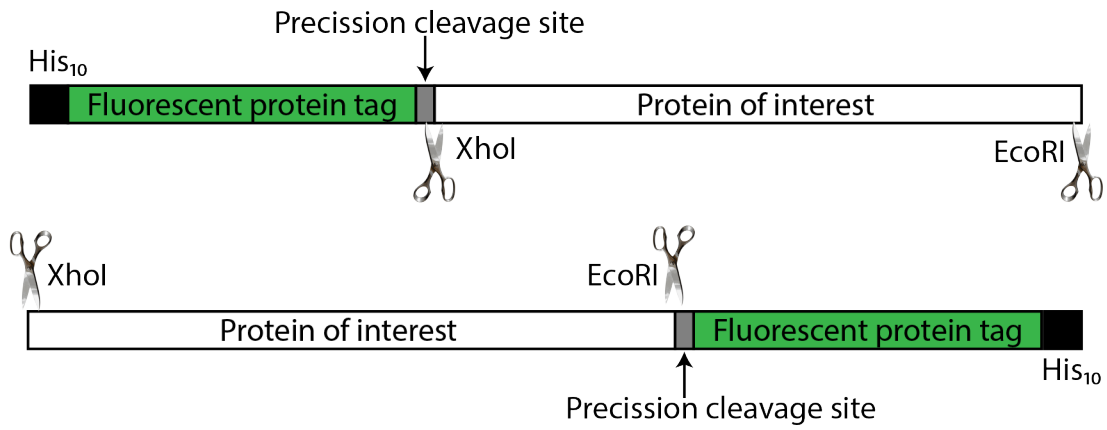

**Figure S2.** Design of the fluorescent protein tag expression cassette. Once the fluorescent protein tags have been inserted by overlap extension PCR, any protein of interest can be ligated in using the XhoI and EcoRI restriction sites.

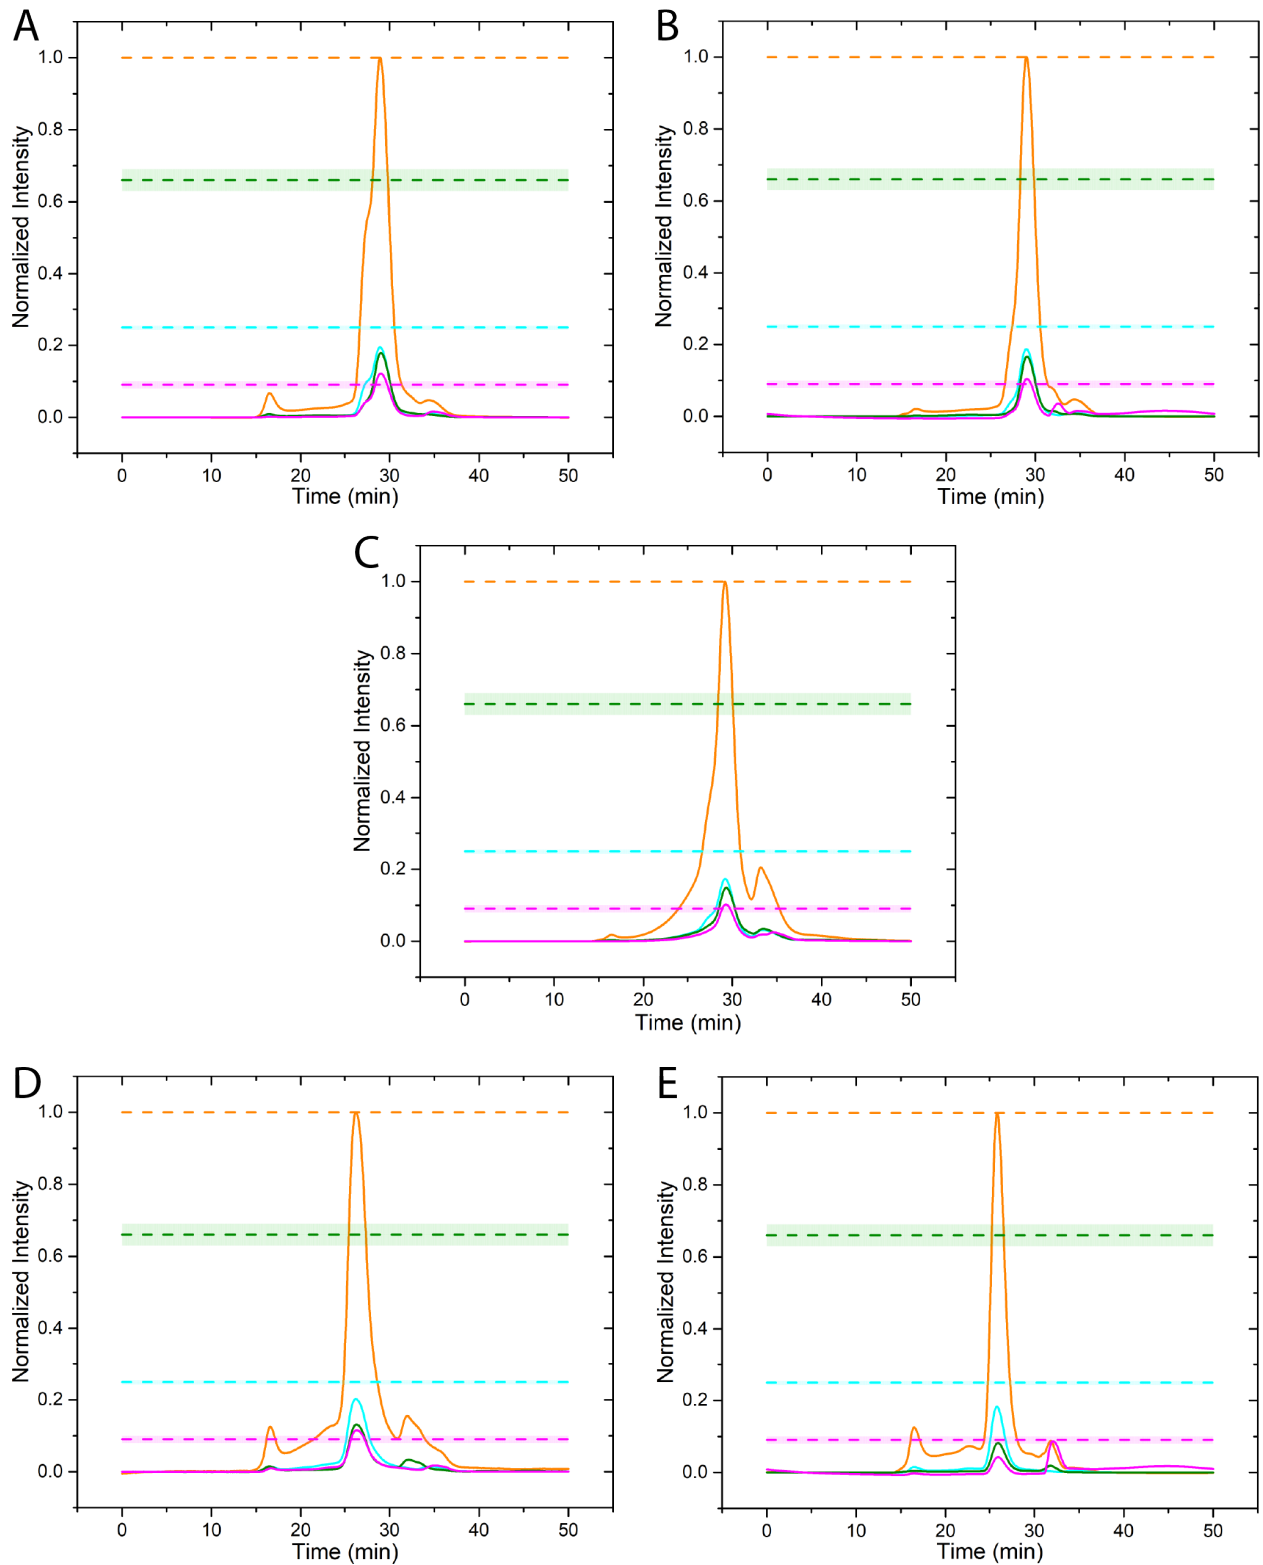

**Figure S3.** Decreased expression of mEGFP tagged proteins is independent of the detergent used for extraction. FSEC chromatogram of human DHHC20 tagged at the N-terminus with mVenus

(orange), mCerulean (cyan), mEGFP (green), and mCherry (magenta) extracted using (A) Cymal 7, (B) Triton X-100, (C) Anzergent 3-14. FSEC chromatogram of *Cyanidioschyzon merolae* CLC (cmCLC) tagged with mVenus (orange), mCerulean (cyan), mEGFP (green), and mCherry (magenta) extracted using (D) Cymal 7, (E) Triton X-100. The dashed lines represent the normalized peak height expected if all the differently tagged proteins expressed equally well. The mVenus:mCerulean:mEGFP:mCherry relationship is  $\sim 1.0:0.25(\pm 0.01):0.65(\pm 0.03):0.1\pm(0.01)$ .



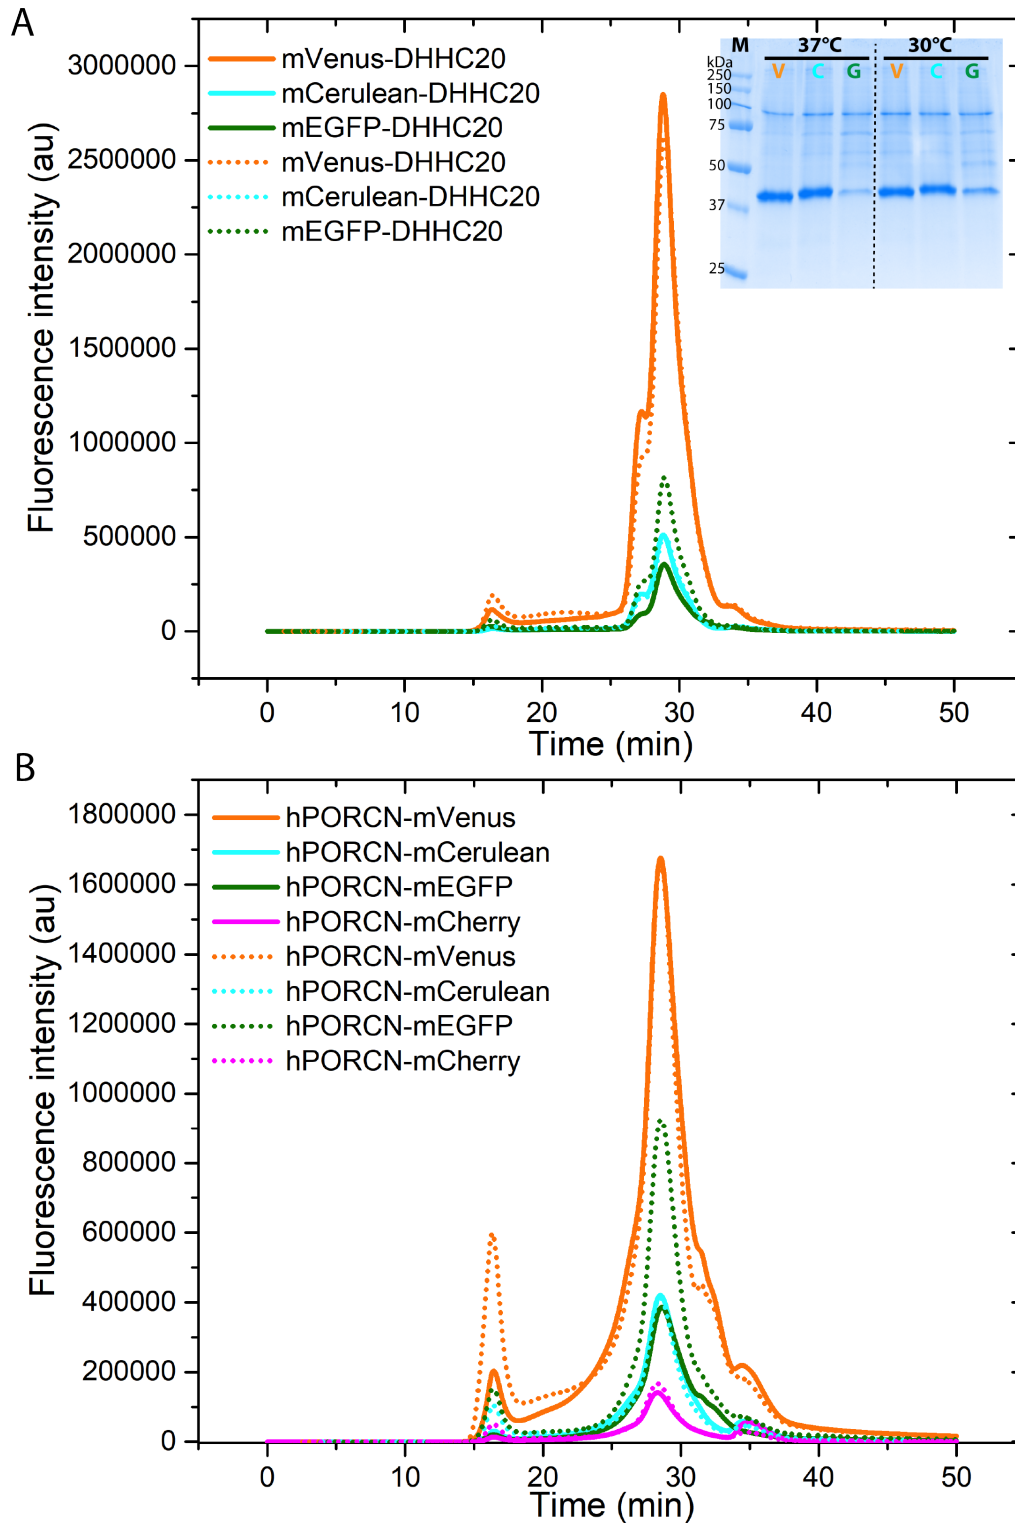

**Figure S4.** FSEC traces showing temperature independence of mVenus and mCerulean tagged proteins. (A) Temperature dependence of FP-DHHC20 expressed at 37 (solid) and 30°C (dotted) in HEK 293S GnTi- cells by baculovirus transduction assessed by FSEC and protein purification

of metal affinity chromatography and SDS-PAGE analysis. Only the mEGFP-DHHC20 trace (green, dotted) increases upon incubation at 30°C. **(B)** Temperature dependence of hPORCN-FP expressed at 37 (solid) and 30°C (dotted) in HEK 293T adherent cells using PEI mediated transient transfection. Only the hPORCN-mEGFP trace (green, dotted) increases upon incubation at 30°C. The chromatograms show the fluorescence values without normalization.
